Review

# Involvement of lipid rafts and caveolae in cardiac ion channel function

Ange Maguy<sup>a</sup>, Terence E. Hebert<sup>b</sup>, Stanley Nattel<sup>a,b,\*</sup>

<sup>a</sup> Department of Medicine and Research Center, Montreal Heart Institute and University of Montreal, 5000 Belanger Street, Montreal, Quebec, Canada H1T 1C8

<sup>b</sup> Department of Pharmacology and Therapeutics, McGill University, 3655 Promenade Sir William Osler, Montreal, Quebec, Canada H3G 1Y6

Received 13 September 2005; received in revised form 28 October 2005; accepted 9 November 2005

Available online 6 January 2006

Time for primary review 20 days

## Abstract

A variety of lipid microdomains, including caveolae, have been shown to play an important role in both protein targeting and in controlling protein–protein interactions. There is increasing evidence for significant ion channel localization in lipid rafts. Cardiac channel subunits known to localize in lipid rafts include Kv1.4, Kv1.5, Kv2.1, Kv4, Kir2, Kir3, K<sub>ATP</sub>, Nav and Cav subunits. This article reviews what is known about the occurrence and functional significance of cardiac ion channel/lipid raft interactions. Much remains to be learned about this area of potentially enormous importance to cardiac function in health and disease.

© 2005 European Society of Cardiology. Published by Elsevier B.V.

**Keywords:** Potassium channel; Caveolae; Connexins; Sodium channel; Calcium channel

## 1. Introduction

Ion channels play a critical role in shaping the cardiac action potential (AP), which governs regional electrical activity [1]. The physiological function of ion channels is affected by interactions with proteins that modulate their activity and/or localization.

The fluid-mosaic model of Singer and Nicholson (1972) considered the membrane as a fluid bilayer with homogeneous lipid distribution [2]. The cell membrane contains >2000 species of lipids [3], some of which associate, whereas others are exclusionary [4]. Such behavior leads to formation of distinct lipid structures resulting in “phase separation” [5]. Phospholipids with relatively long saturated acyl chains and cholesterol pack together to create a liquid-ordered phase (Lo), and bulk phospholipids composed of phosphoglycerolipids with polyunsaturated fatty acids make up the more fluid liquid-disordered phase (Ld) [5]. Lo microdomains, called “lipid rafts”, float in the Ld phase,

like icebergs on the ocean, and have revolutionized our notions of membrane-protein targeting and organization [4,6]. Post-translational protein-modifications like palmitoylation and myristoylation favor protein-localization in lipid rafts [7]. Glycosyl phosphatidyl inositol moieties, known as “GPI anchors” also promote lipid raft localization [8]. Specific transmembrane domain residues govern localization in cholesterol enriched domains and membranes [9]. Protein targeting toward lipid rafts may result from lipid raft specific targeting signals as well as via interactions with other proteins.

The presence of proteins in lipid rafts depends on both lipid and protein content. Current membrane models incorporate clusters of proteins and lipids and consider dynamic remodeling of individual microdomains with protein and lipid inclusion or exclusion followed by microdomain fusion (Fig. 1). Lipid rafts participate actively in signal transduction and cellular adaptation to changing environments.

Small invaginated membrane structures called “caveolae” are the best characterized lipid rafts (Fig. 1). First discovered in the early 1950s using electron microscopy [10], these invaginated membrane structures are enriched in cholesterol

\* Corresponding author. Montreal Heart Institute, 5000 Belanger St. E., Montreal H1T 1C8. Tel.: +1 514 376 3330; fax: +1 514 376 1355.

E-mail address: stanleynattel@aol.com (S. Nattel).

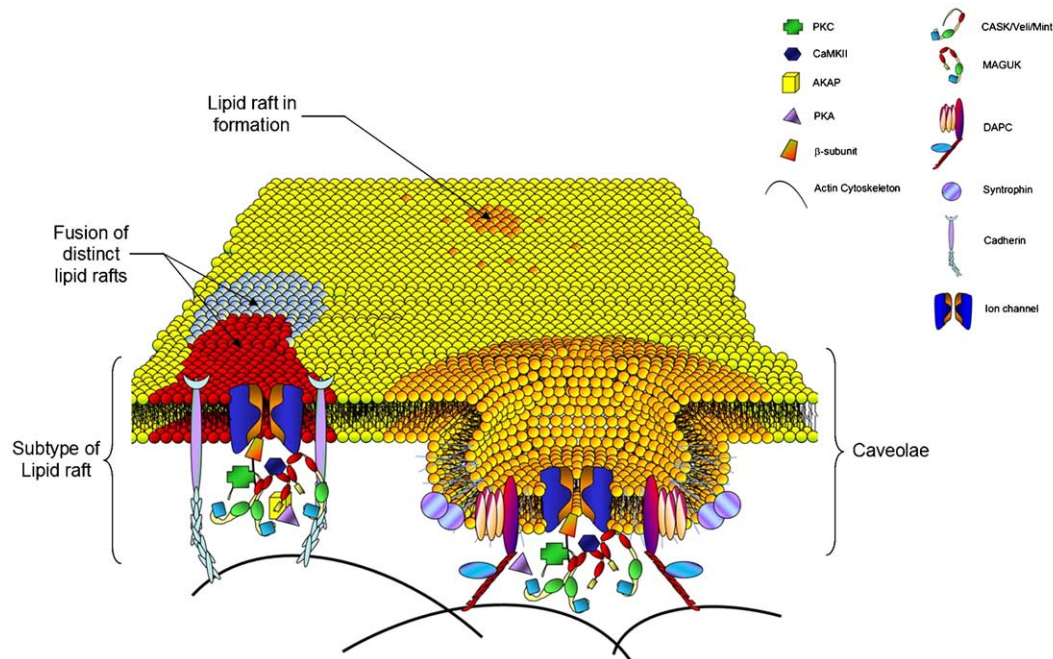

Fig. 1. Schematic representation of lipid raft structures in a plasma membrane. Lipid rafts float in the membrane, constituting distinct signalling platforms depending on lipid raft subtype and composition. While some are invaginated structures (caveolae), others constitute planar plaques. Lipid rafts can fuse, favouring interactions between constituent proteins. Ion channel regulating complexes in cardiomyocytes are also illustrated. DAPCs (Dystrophin Associated Protein Complexes) are anchored in caveolae and stabilize structures interacting with the actin cytoskeleton, whereas other lipid rafts localized at intercalated disks preferentially interact with cadherin complexes for anchorage to the actin cytoskeleton. In both cases, MAGUK proteins favour the clustering of distinct proteins that regulate channel function. For discussion of specific proteins in complexes, see text.

and sphingolipids, along with the small (21–25 kD) cholesterol-binding protein “caveolin” [11]. Caveolin has several isoforms [12] but caveolin-1 and caveolin-3 are the best-characterized. Caveolin-3 is expressed exclusively in myocytes [13]. Caveolins contain a highly hydrophobic 33-amino acid membrane-spanning core. The invaginated caveolar structure results from a core hairpin loop in caveolin [11]. Myocardial caveolin-3 is found in cardiomyocyte t-tubules and sarcolemma but is absent from intercalated disks [14]. Although research on cardiomyocyte microdomains has focused on caveolae, increasing evidence points to heterogeneity of cardiac lipid raft structures [4,15].

## 2. Technical considerations

### 2.1. Biochemical approaches

Lipid rafts are insoluble in non-ionic detergents [4]. Cholesterol and sphingolipids are so tightly packed together in lipid rafts that detergents are generally not strong enough to destabilize them or solubilize proteins anchored in them. Lipid raft microdomains can be separated according to their buoyant density with sucrose or Optiprep gradients. Different detergents possess selectivity for specific lipid raft extraction. Triton X-100 and CHAPS are more selective than Tween-20 and Brij58 (Table 1) [16]. Some detergents solubilize lipids and proteins only partially, yielding an

incomplete picture of raft composition [17]. Some detergents can provoke lipid raft fusion, favouring non-physiological protein interactions [17]. To avoid these artifacts, detergent-free isolation techniques have been developed [18], involving mechanical disruption followed by buoyant-density gradient separation. Recent modifications avoid artifacts due to associated non-lipid raft proteins [18].

### 2.2. Imaging approaches

The localization of ion channels and regulatory partners can be observed with immunofluorescence techniques [19]. One limitation of using constitutively localized proteins as lipid raft markers is partial lipid raft population labeling. New tools allow labeling of the whole lipid raft population [19–22]. Fluorescence Recovery After Photobleaching

Table 1  
Detergent selectivity profile in MDCK cells

| Detergent    | Selectivity | DRM cholesterol/GPL ratio | DRM sphingolipid/GPL ratio |
|--------------|-------------|---------------------------|----------------------------|
| Triton X-100 | +++         | 4.6                       | 3.2                        |
| CHAPS        | +++         | 4                         | 3.5                        |
| Brij 98      | ++          | 2.3                       | 2.3                        |
| Brij 96      | ++          | 1.7                       | 1.7                        |
| Brij 58      | ++          | 1.3                       | 1.3                        |
| Lubrol       | ++          | 1.3                       | 1.4                        |
| Tween 20     | +           | 0.8                       | 0.8                        |

DRM=detergent-resistant membrane; GPL=glycophospholipid.

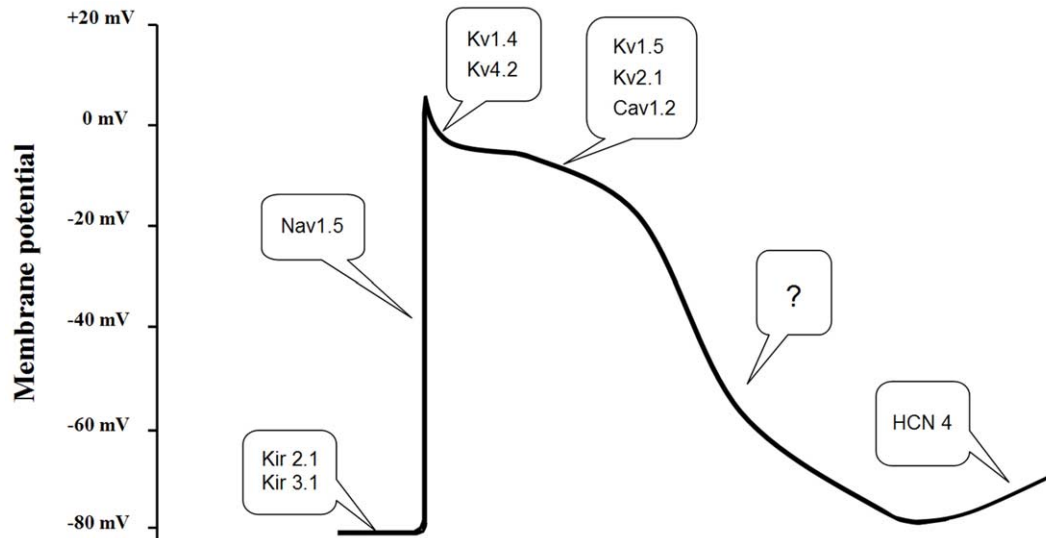

Fig. 2. Illustration of cardiac ion channels known to localize into lipid rafts and their involvement in distinct phases of cardiomyocyte APs. There is still limited knowledge about the lipid raft localization of the subunits (like HERG, KvLQT1 and minK) that control phase-3 repolarization (represented by ?).

(FRAP) is widely used to determine ion channel translational mobility. An early study showed that the membrane-associated guanylate kinase (MAGUK) protein PSD-95 immobilizes Kv1.4 channels at the plasma membrane [23]. Increasing evidence suggests that mobility depends on ion channel localization [24,25]. Caveolae are highly immobile microdomains [26]. Although lipid rafts exhibit distinct rates of lateral diffusion, diffusional mobility is more correlated with membrane anchorage than with raft association [27].

### 2.3. Functional approaches

Another way to study lipid raft ion channel targeting is to analyze ion channel function after disruption of raft structure. Several reagents have been used (Table 2). A frequently used technique is membrane-cholesterol depletion with methyl- $\beta$ -cyclodextrin (MCD) [28]. MCD possesses high affinity for cholesterol, removing it from membranes and causing lipid raft disruption [29].

## 3. Evidence for ion channel localization in lipid rafts/caveolae

A wide range of cardiac ion channel subunits have been localized to lipid rafts, as detailed below. Fig. 2 illustrates the role of these subunits in cardiac APs.

### 3.1. $K^+$ channels

$K^+$  channels are key regulators of the resting membrane potential, which governs excitability, of diastolic conductance, which affects pacemaking function, and of AP repolarization, which determines AP duration and susceptibility to a variety of arrhythmia mechanisms.

#### 3.1.1. *Shab-family (Kv2)*

The first reported cardiac lipid-microdomain ion channel compartmentalization was for Kv2.1 channels. Kv2.1 localized preferentially into the low buoyant-density sarcolemma fraction after cold-extraction with 1% Triton X-100, indicating anchoring in cholesterol-enriched microdomains [30]. Distinct localization patterns for caveolin-1 and Kv2.1 suggest anchoring in non-caveolar lipid rafts [30]. Colcemide, which disrupts microtubules and causes caveolin internalization, did not affect Kv2.1 localization but dramatically altered caveolin-1 localization [30]. In pancreatic  $\beta$ -cells, lipid raft disruption causes a hyperpolarizing shift of Kv2.1 inactivation [31].

#### 3.1.2. *Shaker-family (Kv1)*

Kv1.5-subunits underlie an important repolarizing current ( $I_{Kur}$ ) in atrial myocytes [32]. Kv1.5 function is regulated by various associated proteins, including Kv $\beta$ -subunits [33], MAGUK proteins [34,35] and protein

Table 2  
Chemicals used for disruption of lipid raft structure

| Molecule                               | Effect                              | Comments              | References |
|----------------------------------------|-------------------------------------|-----------------------|------------|
| 5-methyl- $\beta$ -cyclodextrin        | Cholesterol depletion               | Lipid raft disruption | [24]       |
| 2-hydroxypropyl- $\beta$ -cyclodextrin | Cholesterol depletion               | Lipid raft disruption | [24]       |
| Fumonisin B                            | Shingolipids biosynthesis inhibitor | Lipid raft disruption | [24]       |
| Sphingomyelinase                       | Sphingolipid disruption             | Lipid raft disruption |            |
| Cytochalasin D                         | Cytoskeleton disruption             | Caveolae endocytosis  | [26]       |
| Colcemide                              | Cytoskeleton disruption             | Caveolae endocytosis  | [35]       |

kinases [36]. Like Kv2.1, Kv1.5 channels are found in low-density Triton X-100 insoluble fractions [24]. In contrast to Kv2.1, Kv1.5 localization follows caveolin-1 after microtubule disruption-induced caveolar internalization [24]. Treatment with MCD slightly shifts Kv1.5 voltage-dependent activation and inactivation [24]. Association of the MAGUK protein SAP97 with Kv1.5 channels in lipid rafts accelerates C-type inactivation. Acceleration of inactivation is abolished by lipid raft disruption with MCD and recovers with cholesterol replacement [37]. SAP97 acts as a scaffolding protein, favoring Kv1.5-interaction with lipid-microdomain regulatory proteins. A SAP97-caveolin-3 complex in COS-7 cells recruits Kv1.5-subunits via multiple protein–protein interactions [38]. In atrial myocardium, Kv1.5 channels localize in intercalated disks, which lack caveolin-3. Kv1.4 channels have also been found in cholesterol-enriched Triton X-100 insoluble fractions in neurons and HEK cells [39], but not in pancreatic  $\beta$ -cells [31]. This may be due to a requirement for another MAGUK protein, PSD-95, for Kv1.4 micro-localization [39].

### 3.1.3. *Shal-family (Kv4)*

Kv4.2/4.3 is the molecular basis for the  $\text{Ca}^{2+}$ -independent transient outward  $\text{K}^+$  current ( $I_{\text{to}}$ ), which is activated immediately after the cardiac AP upstroke. There is evidence for lipid raft Kv4.2-localization in rat brain and transfected HEK 293 cells [39]. Kv4.2 requires PSD-95 for targeting to the Triton X-100 insoluble fraction. Removal of the putative PDZ-interacting sequence, which permits channel-binding to MAGUK proteins, diminishes Kv4.2 channel lipid raft localization [39]. Thus, other PDZ-domain proteins may be needed for Kv4.2 lipid raft localization. KChIP is a good candidate, since KChIP profoundly affects Kv4.2 intracellular trafficking and function [40]. Palmitoylation, required for efficient Kv4.3–KChIP interaction [41], also favors lipid raft localization [4].

### 3.1.4. *Inwardly rectifying $\text{K}^+$ channels*

**3.1.4.1. Kir2.** Kir2-subunits are essential for the primary inward-rectifier conductance controlling the resting membrane potential in working myocardium. There is presently no biochemical evidence for Kir2-localization into Triton X-100 insoluble membrane fractions. However, membrane cholesterol content modulates Kir2.1 current in aortic endothelial cells [42]. Increased plasma membrane cholesterol decreases Kir2.1 current density, whereas cholesterol-depletion increases current density [42]. Single channel properties of Kir2.1 are not modified, suggesting that cholesterol modulates the number of active membrane Kir2.1 channels [42].

**3.1.4.2. Kir3.** Kir3 subunits underlie the G-protein-coupled acetylcholine-dependent current that is a key modulator of heart rate. Kir3.1 subunits co-precipitate with  $\text{G}\beta\gamma$ , PKAc, PP1c and PP2A [43]. Most of these localize into lipid rafts [44]. In neurons and CHO cells, Kir3.1 channels localize in

low buoyant-density fractions following extraction with 1% Triton X-100 and sucrose-gradient separation [45].

**3.1.4.3. ATP-sensitive  $\text{K}^+$  current ( $K_{\text{ATP}}$ ).**  $K_{\text{ATP}}$  channels serve as endogenous homeostatic transducers, balancing cellular resources and metabolic demands. Cardiac  $K_{\text{ATP}}$  channels protect against the metabolic insult of ischemia and contribute to adaptive responses to metabolic stress [46].  $K_{\text{ATP}}$  channels regulate vascular delivery of metabolic resources [47]. While ATP-sensitive  $\text{K}^+$  channels in the adult heart classically consist of Kir6.2 and SUR2A-subunits, Kir6.1, SUR1 and SUR2B-subunits are also expressed in adult mouse hearts [48].

Pancreatic  $\beta$ -cell Kir6.2 and SUR1-subunits localize to the bulk plasma membrane following detergent-free extraction and separation on sucrose step-gradients [31]. In rat aortic smooth muscle cells, Kir 6.1 colocalizes with an upstream signaling partner, adenylyl cyclase, in caveolin-enriched low buoyant-density fractions after detergent-free extraction and sucrose-gradient separation [49]. Caveolin co-immunoprecipitates with Kir6.1 from arterial homogenates, supporting Kir6.1-caveolin co-localization. Lipid raft structure disruption reduces the cAMP-dependant, protein-kinase A (PKA)-sensitive component of  $K_{\text{ATP}}$  current, indicating that lipid raft integrity is important for adenylyl cyclase-mediated channel modulation [49].

### 3.1.5. *$\text{Ca}^{2+}$ -activated $\text{K}^+$ channels*

Recently, high-conductance  $\text{Ca}^{2+}$ -activated  $\text{K}^+$  channels ( $K_{\text{Ca}}$ ) have been shown to contribute to ischemic preconditioning [50,51], primarily in the early trigger-phase [51]. There is no direct evidence for  $K_{\text{Ca}}$  channel localization in cardiomyocyte-membrane lipid rafts. PKC inhibits [52], whereas PKA activates [53],  $K_{\text{Ca}}$  channels. Both PKA and PKC appear to localize in caveolae [54,55]. Membrane cholesterol content modulates high-conductance  $K_{\text{Ca}}$  activation in colonic epithelia [56]. The *hSlo* channel, the molecular equivalent of  $K_{\text{Ca}}$ , is found in Triton X-100 insoluble fractions of transfected MDCK cells [57].

### 3.1.6. *Summary*

Compartmentalization of cardiac  $\text{K}^+$  channels illustrates lipid raft heterogeneity. While some channels localize in caveolae, others associate with other lipid raft subtypes (Table 3). These results also point to the differential targeting of channel function and regulation. Finally, some channels require interaction with other proteins, such as MAGUK, for localization in membrane microdomains.

### 3.2. *$\text{Na}^+$ channels*

Phase-0  $\text{Na}^+$ -flow through voltage-gated  $\text{Na}^+$  channels produces activation and electrical-impulse conduction. Nav1.5 sodium channel mutations lead to arrhythmic channelopathies like congenital long QT syndrome, Brugada syndrome, conduction disorders and sudden death [58].

Table 3  
Summary of presently recognized cardiac ion channel localization in lipid raft structures

| Channel-subunit           | Membrane localization            | Cell type studied                                         | References    |
|---------------------------|----------------------------------|-----------------------------------------------------------|---------------|
| Kv1.4                     | Non-caveolar lipid raft          | HEK cells                                                 | [39]          |
| Kv1.4                     | Bulk plasma membrane             | Pancreatic beta-cells                                     | [31]          |
| Kv1.5                     | Caveolae                         | L-cells, Ventricular cardiomyocytes                       | [24,38]       |
| Kv1.5                     | Non-caveolar lipid raft          | Atrial cardiomyocytes                                     | [37]          |
| Kv2.1                     | Non-caveolar lipid raft          | L-cells                                                   | [30]          |
| Kv4.2                     | Subtype of lipid rafts           | HEK cells                                                 | [39]          |
| Kir2.1                    | Cholesterol enriched lipid raft  | Aortic endothelial cells                                  | [42]          |
| Kir3.1                    | Subtype of lipid rafts           | CHO cells, neurons                                        | [45]          |
| Kir6.1                    | Cholesterol enriched lipid rafts | Rat aortic SMC                                            | [49]          |
| Kir6.2                    | Bulk plasma membrane             | Pancreatic beta-cells                                     | [31]          |
| K <sub>Ca</sub> channel   | Subtype of lipid rafts           | MDCK cells                                                | [57]          |
| Nav1.5                    | Caveolae                         | Ventricular myocytes                                      | [14]          |
| Cav1.2                    | Caveolae                         | Cardiomyocytes, SMC, Pancreatic beta-cells                | [25,31,68,69] |
| IP <sub>3</sub> -receptor | Caveolae                         | Various                                                   | [77]          |
| HCN4                      | Caveolae                         | Sinus-node cardiomyocytes                                 | [80]          |
| Connexin-43               | Caveolae                         | Alveolar epithelial cells, Various transfected cell types | [25,81,82]    |

HEK=Human Embryonic Kidney; CHO=Chinese Hamster Ovary; SMC=Smooth muscle cells.

The sympathetic nervous system modulates cardiac Na<sup>+</sup> channel function via  $\beta$ -adrenergic ( $\beta$ AR) pathways [59]. Both *indirect* PKA-dependant modulation and *direct* G-protein modulation occur [60,61]. I<sub>Na</sub> enhancement occurs without changes in single channel characteristics or voltage-dependent activation [59,62], suggesting that increased current density may be due to increased numbers of functional channels in the sarcolemma [59]. The short time-frame of I<sub>Na</sub>-increase implies rapid membrane recruitment of Na<sup>+</sup> channels, suggesting a sub-sarcolemmal reservoir. The localization of  $\beta$ ARs in cardiac caveolae [63] and the role of lipid rafts in protein-trafficking make them candidates for the location of “recruitable” Na<sup>+</sup> channels [14]. Dialysis of caveolin-3 antibodies into atrial myocytes abolishes “direct” G $\alpha$ s-induced I<sub>Na</sub> increases, Na<sup>+</sup> channels co-localize with G $\alpha$ s in the caveolin-3 enriched fraction, and caveolin-3 co-precipitates and co-localizes with Na<sup>+</sup> channels and G $\alpha$ s-subunits [14]. These results suggest that tripartite caveolar complexes of caveolin-3, Na<sup>+</sup> channels, and G $\alpha$ s constitute the reservoir of functional Na<sup>+</sup> channels recruited by  $\beta$ AR activation, and the site of Na<sup>+</sup> channel phosphorylation by activated PKA.

### 3.3. Ca<sup>2+</sup> channels

#### 3.3.1. L-type Ca<sup>2+</sup> channels and Ca<sup>2+</sup>-release channels

Depolarization-induced Ca<sup>2+</sup> entry through L-type Ca<sup>2+</sup> channels (LTCCs) maintains the AP plateau and activates nearby Ca<sup>2+</sup>-release channels or “ryanodine-receptors” (RyRs) in the sarcoplasmic reticulum (SR), releasing Ca<sup>2+</sup> via “Ca<sup>2+</sup>-induced Ca<sup>2+</sup> release” (CICR) [64] and producing excitation-contraction coupling. In cardiomyocytes, LTCCs are mainly localized within the t-tubular network. This localization is profoundly altered in caveolin-3 null-mice [65]. Several studies suggest that caveolae are responsible for the LTCC/RyR co-localization that underlies CICR. This function may be particularly important in atrial cardiomyo-

cytes, whose t-tubular system is less developed than in ventricular cells. The most efficacious Ca<sup>2+</sup>-signal for SR Ca<sup>2+</sup>-release may be a transient microdomain of high [Ca<sup>2+</sup>]<sub>i</sub> beneath individual, open LTCCs [66]. High-[Ca<sup>2+</sup>]<sub>i</sub> domains may be more easily obtained with invaginated structures like caveolae [67,68], although the precise role of microdomain-structure in Ca<sup>2+</sup>-dynamics awaits clarification. Cardiomyocyte cholesterol depletion decreases the frequency, amplitude and width of Ca<sup>2+</sup>-sparks [68]. In pancreatic  $\beta$ -cells, Cav1.2, the pore-forming subunit of LTCCs, is found in low buoyant-density membrane-fractions enriched in caveolin [31]. Moreover, the  $\alpha$ 1-chain is preferentially found in caveolin-rich detergent-insoluble fractions of smooth muscle cells and cardiomyocytes [25,69].

#### 3.3.2. IP<sub>3</sub> receptors

Inositol-1,4,5-trisphosphate receptors (IP<sub>3</sub>-receptors) are intracellular Ca<sup>2+</sup> channels releasing Ca<sup>2+</sup> from the sarcoplasmic reticulum. Type 1 and 2 IP<sub>3</sub>-receptors are found in the heart, predominantly in atria [70]. Their role is controversial [71]. IP<sub>3</sub>-dependant Ca<sup>2+</sup>-release likely enhances atrial Ca<sup>2+</sup>-signaling, exerting positive inotropic effects, and may contribute to Ca<sup>2+</sup>-dependent atrial arrhythmias [72].

IP<sub>3</sub> receptors interact with ankyrin-B [73]. Ankyrins are membrane-associated adapter proteins [74] that bind other proteins via membrane-binding domains. Ankyrin-B knockout mice show mislocalization of cardiac IP<sub>3</sub>-receptors, suggesting an essential role for ankyrin-B in their targeting [75]. Ankyrin-B mutations produce long-QT syndrome arrhythmias and sudden death, to which IP<sub>3</sub>-receptor dysfunction could contribute [76].

IP<sub>3</sub>-receptors localize to Triton X-100 insoluble caveolin-enriched fractions and electronic-microscopy localizes IP<sub>3</sub>-receptors to caveolae-like invaginated structures [77]. A link between ankyrin-B and lipid-microdomain localization of IP<sub>3</sub>-receptors is suggested by the following evidence [78]: In aortic endothelial cells, hyaluronan increases the number of

CD44 receptors in the Triton X-100 insoluble caveolin-rich fraction. Immunoprecipitation of the caveolin-rich fraction results in co-precipitation of ankyrin-B, IP<sub>3</sub>-receptors and CD44, but in the absence of hyaluronan neither ankyrin-B nor IP<sub>3</sub>-receptors co-precipitate with CD44. Lipid raft disruption by cholesterol-depletion inhibits IP<sub>3</sub>-receptor association with caveolae and suppresses Ca<sup>2+</sup>-signaling. Thus, physical association between CD44-containing lipid rafts and IP<sub>3</sub>-receptors may be important for triggering Ca<sup>2+</sup>-release from internal stores.

### 3.4. Hyperpolarization-activated, cyclic-nucleotide binding channels (HCNs)

The hyperpolarization-activated non-selective cation current, first called “funny current” or I<sub>f</sub>, is believed to be important in cardiac automaticity. I<sub>f</sub> is carried by HCN-subunits, with HCN4 particularly important in the heart [1]. HCN4-subunit function is finely controlled by βAR and muscarinic-cholinergic regulation. Most proteins in the βAR-pathway are localized in lipid rafts and sinus-node cardiomyocytes are rich in caveolae [79]. HCN4-subunits are found in low-density fractions of sinus-node cardiomyocyte preparations containing flotilin and caveolin [80]. Lipid raft disruption alters HCN4-subunit localization, shifts I<sub>f</sub>-activation in the depolarizing direction and reduces deactivation, accelerating diastolic depolarization and heart rate [80].

### 3.5. Connexins

Myocytes are linked via gap junctions to form an electrically continuous syncytium that permits AP propagation. Gap junctions contain hemichannel connexin proteins which subserve their electrical function. Cardiomyocytes actively adjust their coupling by changes in connexin expression, regulation of connexin trafficking and turnover, and modulation of connexin channel properties [81].

Connexin-43, the major cardiac isoform, co-localizes with caveolin-1 in low buoyant-density Triton X-100 insoluble fractions and co-immunoprecipitates with caveolin-1 [25,81,82]. Caveolin is not found in myocardial intercalated disks, so other lipid raft structures may produce connexin-43 localization to in vivo intercalated-disk microdomains [83,84]. The MAGUK protein ZO-1, a major connexin-interacting protein, mediates delivery of connexin-43 from lipid raft domains to gap-junctional plates [85]. There is increased association of ZO-1 with connexin-43 during cardiac gap-junction remodeling [86].

## 4. Lipid rafts as a scaffolding structure for ion channel regulation

Ion channel biophysical properties are determined by their 3-dimensional structure and related interactions with

regulatory proteins. Structures that include channel-subunits and regulatory proteins have been termed “channelosomes”. Channelosome structure depends on the microdomains that incorporate protein constituents. MAGUK proteins appear crucial in forming channelosomes. While PSD-95 is required for Kv1.4 localization in lipid rafts, SAP-97 serves a similar role for Kv1.5 [37–39]. SAP-97 and PSD-95 are also part of Kir2-containing complexes. [87]. These proteins can bind other scaffolding proteins, such as CASK, Veli and Mint, forming the skeleton of the channelosome architecture [88–90]. CASK is present in lipid rafts and the multiprotein complex SAP97/CASK/Veli/Mint1 is essential for trafficking and plasma membrane localization of Kir2 channels [87,91]. CASK interacts with the N-type Ca<sup>2+</sup> channel [92]. Such proteins bind directly to ion channels, offering protein-binding surfaces such as PDZ-domains and recruiting regulatory proteins to intracellular sites [93]. For instance, SAP-97 favors Kvβ–Kv1.5 association in lipid rafts, increasing C-type inactivation [37]. Kvβ may also recruit PKC to the channel complex by interacting with the PKCζ-interacting (ZIP) protein [94]. SAP-97 and PSD95 also bind type-II Ca<sup>2+</sup>-activated calmodulin-kinase (CAMKII) [95,96], which regulates numerous ion channels as a function of intracellular Ca<sup>2+</sup> concentration. Most channels regulated by CAMKII localize in lipid rafts, including Kv1.5, Na<sup>+</sup> channels, LTCCs and IP<sub>3</sub>-receptors [97–102], and CAMKII localizes to lipid rafts [103,104].

PSD-95 and SAP-97 also bind A-kinase anchoring proteins (AKAPs), which localize PKA in close proximity to ion channels. PKA is found in lipid rafts [105,106]. KCNQ1, the pore-forming subunit of the cardiac repolarizing current I<sub>Ks</sub>, associates with both PKA and protein-phosphatase 1 (PP1) through the protein yotiao, promoting sympathetic regulation [107]. The interaction of AKAP with PKA is required for cAMP-dependent regulation of LTCCs [108]. AKAPs interact with the β<sub>2</sub>AR, favoring localization of the β<sub>2</sub>-adrenergic pathway within channelosomes [109]. Stimulation of β<sub>2</sub>ARs increases cardiac contractility without globally increasing cAMP [110], suggesting that LTCCs and the β<sub>2</sub>AR transduction pathway share a privileged signaling microenvironment. LTCCs co-assemble with β<sub>2</sub>ARs, G<sub>αs</sub>, adenylyl-cyclase, PKA and phosphatase–PP2A [111]. In adult cardiomyocytes, β<sub>2</sub>ARs are found exclusively in low buoyant-density fractions enriched in caveolin-3, together with G<sub>αs</sub> and adenylyl-cyclase [112].

## 5. Interactions with cytoskeletal proteins

Kir2 channels are associated with the dystrophin-associated protein complex (DAPC) [87]. DAPC forms a structural link between the actin cytoskeleton and the extracellular matrix and is especially prevalent in muscle cells [113]. Caveolin-3 null mice show important changes in DAPC distribution and t-tubule abnormalities [65].

Caveolin-3 associates with dystrophin and interacts directly with the C-terminal tail of  $\beta$ -dystroglycan, part of the DAPC [114]. Dystroglycan also regulates caveolin-3 distribution [115]. In *mdx* mice deficient in dystrophin [116], mini-dystrophin restores LTCC current in skeletal-muscle myocytes, suggesting that dystrophin influences LTCCs [117]. Dystrophin and  $\alpha$ -actinin regulate caveolae by anchoring them to the actin cytoskeleton.  $\text{Na}^+$  channels, which localize in cardiomyocyte t-tubular caveolae, interact specifically with syntrophin, another constitutive DAPC protein [118].

N-cadherin and catenins are principally found in the low buoyant-density fractions of myoblast plasma membranes [119]. SAP97, which co-localizes with Kv1.5 channels at the intercalated disk, also binds cadherin [34,37]. Connexin-43, which is found in intercalated-disk lipid rafts, is also associated with the N-cadherin multiprotein complex. Cell-surface expression of connexin-43 requires N-cadherin and vice versa [120].

## 6. Pathophysiological implications

Structural remodeling of caveolae occurs in cardiac pathologies. The cardiac distribution of caveolin-3 is dramatically altered by heart failure, with an increased proportion of caveolin-3 in the detergent-soluble fraction [121]. Caveolin-3 knock-out mice exhibit progressive cardiomyopathy with hypertrophy, dilation, and reduced fractional shortening [122]. Caveolin-3 over-expression induces cardiac degeneration, fibrosis and cardiac-function impairment, along with DAPC downregulation [123]. ANP is found in rat-cardiomyocyte caveolae [124]. ANP modulates cardiac hypertrophy and remodeling; ANP deficiency exaggerates hypertrophy and remodeling after pressure overload [125]. ANP binds to caveolar B-type ANP receptors, which possess guanylyl cyclase activity. cGMP formation leads to cGMP-dependent kinase activation, which can inhibit LTCC activity and thereby reduce contractility [124]. Furthermore ANP modulates  $I_f$  in human atrial cardiomyocytes [126]. Thus, caveolar integrity may be important in myocardial adaptation to mechanical overload. Lipid rafts and caveolae are acutely affected by mechanical events. Mechanical overload can also induce membrane fusion of caveolae [127].

Statins, which directly act on the cholesterol synthesis pathway, are widely used for the prevention of cardiovascular disease. Recent studies showed that statin therapy affects caveolar turnover by limiting their endocytosis [128]. Atorvastatin has also been shown to modulate the cholesterol enrichment of the lipid rafts [129]. Thus, many effects of these molecules may be due to lipid raft modification.

Given the evidence for ion channel localization in lipid rafts, pathological modifications in lipid raft structures and distribution may underlie ion channel dysfunction and associated arrhythmias in conditions like hypertension, diabetes, ischemic heart disease and heart failure.

## 7. Conclusions

Lipid rafts constitute dynamic platforms that float in cardiomyocyte membranes. Enriched in signaling molecules and ion channel regulatory proteins, the various forms of lipid rafts exhibit distinct protein populations and membrane-anchoring mechanisms. Thus, they can actively participate in differential cardiomyocyte ion channel targeting and regulation. At present, little is known about the role of lipid rafts in cardiac dysfunction and arrhythmias. Recent technical advances will help to further our understanding of these important membrane structures and their role in cardiac health and disease.

## Acknowledgments

Supported by Canadian Institutes of Health Research.

## References

- [1] Zicha S, Fernandez-Velasco M, Lonardo G, L'Heureux N, Nattel S. Sinus node dysfunction and hyperpolarization-activated (HCN) channel subunit remodeling in a canine heart failure model. *Cardiovasc Res* 2005;66:472–81.
- [2] Brown DA, London E. Structure and origin of ordered lipid domains in biological membranes. *J Membr Biol* 1998;164:103–14.
- [3] Barenholz Y. Liposomology. *Prog Lipid Res* 2000;39:1–2.
- [4] Pike LJ. Lipid rafts: heterogeneity on the high seas. *Biochem J* 2004;378:281–92.
- [5] Binder WH, Barragan V, Menger FM. Domains and rafts in lipid membranes. *Angew Chem Int Ed Engl* 2003;42:5802–27.
- [6] Lucero HA, Robbins PW. Lipid rafts-protein association and the regulation of protein activity. *Arch Biochem Biophys* 2004;426:208–24.
- [7] Zacharias DA, Violin JD, Newton AC, Tsien RY. Partitioning of lipid-modified monomeric GFPs into membrane microdomains of live cells. *Science* 2002;296:913–6.
- [8] Saslowsky DE, Lawrence J, Ren X, Brown DA, Henderson RM, Edwardson JM. Placental alkaline phosphatase is efficiently targeted to rafts in supported lipid bilayers. *J Biol Chem* 2002;277:26966–70.
- [9] Munro S. A comparison of the transmembrane domains of Golgi and plasma membrane proteins. *Biochem Soc Trans* 1995;23:527–30.
- [10] Palade GE. An electron microscope study of the mitochondrial structure. *J Histochem Cytochem* 1953;1:188–211.
- [11] Murata M, Peranen J, Schreiner R, Wieland F, Kurzchalia TV, Simons K. VIP21/caveolin is a cholesterol-binding protein. *Proc Natl Acad Sci U S A* 1995;92:10339–43.
- [12] Tang Z, Scherer PE, Okamoto T, Song K, Chu C, Kohtz DS, et al. Molecular cloning of caveolin-3, a novel member of the caveolin gene family expressed predominantly in muscle. *J Biol Chem* 1996;271:2255–61.
- [13] Song KS, Scherer PE, Tang Z, Okamoto T, Li S, Chafel M, et al. Expression of caveolin-3 in skeletal, cardiac, and smooth muscle cells. Caveolin-3 is a component of the sarcolemma and co-fractionates with dystrophin and dystrophin-associated glycoproteins. *J Biol Chem* 1996;271:15160–5.
- [14] Yarbrough TL, Lu T, Lee HC, Shibata EF. Localization of cardiac sodium channels in caveolin-rich membrane domains: regulation of sodium current amplitude. *Circ Res* 2002;90:443–9.

- [15] Rozelle AL, Machesky LM, Yamamoto M, Driessens MH, Insall RH, Roth MG, et al. Phosphatidylinositol 4,5-bisphosphate induces actin-based movement of raft-enriched vesicles through WASP-Arp2/3. *Curr Biol* 2000;10:311–20.
- [16] Schuck S, Honsho M, Ekroos K, Shevchenko A, Simons K. Resistance of cell membranes to different detergents. *Proc Natl Acad Sci U S A* 2003;100:5795–800.
- [17] Shogomori H, Brown DA. Use of detergents to study membrane rafts: the good, the bad, and the ugly. *Biol Chem* 2003;384:1259–63.
- [18] Macdonald JL, Pike LJ. A simplified method for the preparation of detergent-free lipid rafts. *J Lipid Res* 2005;46:1061–7.
- [19] Mukherjee S, Chattopadhyay A. Monitoring cholesterol organization in membranes at low concentrations utilizing the wavelength-selective fluorescence approach. *Chem Phys Lipids* 2005;134:79–84 [CVR-2005-1012R1 19].
- [20] Sato SB, Ishii K, Makino A, Iwabuchi K, Yamaji-Hasegawa A, Senoh Y, et al. Distribution and transport of cholesterol-rich membrane domains monitored by a membrane-impermeant fluorescent polyethylene glycol-derivatized cholesterol. *J Biol Chem* 2004;279:23790–6.
- [21] Ishitsuka R, Kobayashi T. Lysenin: a new tool for investigating membrane lipid organization. *Anat Sci Int* 2004;79:184–90.
- [22] Jin L, Millard AC, Wuskell JP, Clark HA, Loew LM. Cholesterol-enriched lipid domains can be visualized by di-4-ANEPPDHQ with linear and nonlinear optics. *Biophys J* 2005;89:L04–6.
- [23] Burke NA, Takimoto K, Li D, Han W, Watkins SC, Levitan ES. Distinct structural requirements for clustering and immobilization of K<sup>+</sup> channels by PSD-95. *J Gen Physiol* 1999;113:71–80.
- [24] Martens JR, Sakamoto N, Sullivan SA, Grobaski TD, Tamkun MM. Isoform-specific localization of voltage-gated K<sup>+</sup> channels to distinct lipid raft populations. Targeting of Kv1.5 to caveolae. *J Biol Chem* 2001;276:8409–14.
- [25] O'Connell KM, Martens JR, Tamkun MM. Localization of ion channels to lipid Raft domains within the cardiovascular system. *Trends Cardiovasc Med* 2004;14:37–42.
- [26] Thomsen P, Roepstorff K, Stahlhut M, van Deurs B. Caveolae are highly immobile plasma membrane microdomains, which are not involved in constitutive endocytic trafficking. *Mol Biol Cell* 2002;13:238–50.
- [27] Kenworthy AK, Nichols BJ, Remmert CL, Hendrix GM, Kumar M, Zimmerberg J, et al. Dynamics of putative raft-associated proteins at the cell surface. *J Cell Biol* 2004;165:735–46.
- [28] Kilsdonk EP, Yancey PG, Stoudt GW, Bangerter FW, Johnson WJ, Phillips MC, et al. Cellular cholesterol efflux mediated by cyclodextrins. *J Biol Chem* 1995;270:17250–6.
- [29] Harder T, Simons K. Caveolae, DIGs, and the dynamics of sphingolipid-cholesterol microdomains. *Curr Opin Cell Biol* 1997;9:534–42.
- [30] Martens JR, Navarro-Polanco R, Coppock EA, Nishiyama A, Parshley L, Grobaski TD, et al. Differential targeting of Shaker-like potassium channels to lipid rafts. *J Biol Chem* 2000;275:7443–6.
- [31] Xia F, Gao X, Kwan E, Lam PP, Chan L, Sy K, et al. Disruption of pancreatic beta-cell lipid rafts modifies Kv2.1 channel gating and insulin exocytosis. *J Biol Chem* 2004;279:24685–91.
- [32] Feng J, Wible B, Li GR, Wang Z, Nattel S. Antisense oligodeoxynucleotides directed against Kv1.5 mRNA specifically inhibit ultrarapid delayed rectifier K<sup>+</sup> current in cultured adult human atrial myocytes. *Circ Res* 1997;80:572–9.
- [33] Uebele VN, England SK, Chaudhary A, Tamkun MM, Snyders DJ. Functional differences in Kv1.5 currents expressed in mammalian cell lines are due to the presence of endogenous Kv beta 2.1 subunits. *J Biol Chem* 1996;271:2406–12.
- [34] Godreau D, Vranckx R, Maguy A, Rucker-Martin C, Goyenvallé C, Abdelshafy S, et al. Expression, regulation and role of the MAGUK protein SAP-97 in human atrial myocardium. *Cardiovasc Res* 2002;56:433–42.
- [35] Godreau D, Vranckx R, Maguy A, Goyenvallé C, Hatem SN. Different isoforms of synapse-associated protein, SAP97, are expressed in the heart and have distinct effects on the voltage-gated K<sup>+</sup> channel Kv1.5. *J Biol Chem* 2003;278:47046–52.
- [36] Williams CP, Hu N, Shen W, Mashburn AB, Murray KT. Modulation of the human Kv1.5 channel by protein kinase C activation: role of the K<sub>v</sub>β1.2 subunit. *J Pharmacol Exp Ther* 2002;302:545–50 [CVR-2005-1012R1 20].
- [37] Maguy A, Bouyon E, Heymes C, Vranckx R, Samuel JL, Hatem SN. Lipid raft microdomain integrity is essential for the potassium current properties in atrial myocardium. *Circulation* 2004;110:61.
- [38] Folco EJ, Liu GX, Koren G. Caveolin-3 and SAP97 form a scaffolding protein complex that regulates the voltage-gated potassium channel Kv1.5. *Am J Physiol Heart Circ Physiol* 2004;287:H681–90.
- [39] Wong W, Schlichter LC. Differential recruitment of Kv1.4 and Kv4.2 to lipid rafts by PSD-95. *J Biol Chem* 2004;279:444–52.
- [40] Shibata R, Misonou H, Campomanes CR, Anderson AE, Schrader LC, Doliveira LC, et al. A fundamental role for KChIPs in determining the molecular properties and trafficking of Kv4.2 potassium channels. *J Biol Chem* 2003;278:36445–54.
- [41] Takimoto K, Yang EK, Conforti L. Palmitoylation of KChIP splicing variants is required for efficient cell surface expression of Kv4.3 channels. *J Biol Chem* 2002;277:26904–11.
- [42] Romanenko VG, Rothblat GH, Levitan I. Modulation of endothelial inward-rectifier K<sup>+</sup> current by optical isomers of cholesterol. *Biophys J* 2002;83:3211–22.
- [43] Nikolov EN, Ivanova-Nikolova TT. Coordination of membrane excitability through a GIRK1 signaling complex in the atria. *J Biol Chem* 2004;279:23630–6.
- [44] Insel PA, Head BP, Ostrom RS, Patel HH, Swaney JS, Tang CM, et al. Caveolae and lipid rafts: g protein-coupled receptor signaling microdomains in cardiac myocytes. *Ann NY Acad Sci* 2005;1047:166–72.
- [45] Delling M, Wischmeyer E, Dityatev A, Sytnyk V, Veh RW, Karschin A, et al. The neural cell adhesion molecule regulates cell-surface delivery of G-protein-activated inwardly rectifying potassium channels via lipid rafts. *J Neurosci* 2002;22:7154–64.
- [46] Patel HH, Gross ER, Peart JN, Hsu AK, Gross GJ. Sarcolemmal KATP channel triggers delayed ischemic preconditioning in rats. *Am J Physiol Heart Circ Physiol* 2005;288:H445–7.
- [47] Seino S, Miki T. Physiological and pathophysiological roles of ATP-sensitive K<sup>+</sup> channels. *Prog Biophys Mol Biol* 2003;81:133–76.
- [48] Morrissey A, Rosner E, Lanning J, Parachuru L, Dhar Chowdhury P, Han S, et al. Immunolocalization of KATP channel subunits in mouse and rat cardiac myocytes and the coronary vasculature. *BMC Physiol* 2005;5:1.
- [49] Sampson LJ, Hayabuchi Y, Standen NB, Dart C. Caveolae localize protein kinase A signaling to arterial ATP-sensitive potassium channels. *Circ Res* 2004;95:1012–8.
- [50] Cao CM, Xia Q, Gao Q, Chen M, Wong TM. Calcium-activated potassium channel triggers cardioprotection of ischemic preconditioning. *J Pharmacol Exp Ther* 2005;312:644–50.
- [51] Shintani Y, Node K, Asanuma H, Sanada S, Takashima S, Asano Y, et al. Opening of Ca<sup>2+</sup>-activated K<sup>+</sup> channels is involved in ischemic preconditioning in canine hearts. *J Mol Cell Cardiol* 2004;37:1213–8.
- [52] Schubert R, Noack T, Serebryakov VN. Protein kinase C reduces the K<sub>Ca</sub> current of rat tail artery smooth muscle cells. *Am J Physiol* 1999;276:C648–58.
- [53] Carl A, Kenyon JL, Uemura D, Fusetani N, Sanders KM. Regulation of Ca(2+)-activated K<sup>+</sup> channels by protein kinase A and phosphatase inhibitors. *Am J Physiol* 1991;261:C387–92.
- [54] Kabouridis PS, Janzen J, Magee AL, Ley SC. Cholesterol depletion disrupts lipid rafts and modulates the activity of multiple signaling pathways in T lymphocytes. *Eur J Immunol* 2000;30:954–63 [CVR-2005-1012R1 21].



- [55] Razani B, Lisanti MP. Two distinct caveolin-1 domains mediate the functional interaction of caveolin-1 with protein kinase A. *Am J Physiol Cell Physiol* 2001;281:C1241–50.
- [56] Lam RS, Shaw AR, Duszyk M. Membrane cholesterol content modulates activation of BK channels in colonic epithelia. *Biochim Biophys Acta* 2004;1667:241–8.
- [57] Bravo-Zehnder M, Orio P, Norambuena A, Wallner M, Meera P, Toro L, et al. Apical sorting of a voltage- and Ca<sup>2+</sup>-activated K<sup>+</sup> channel alpha-subunit in Madin–Darby canine kidney cells is independent of N-glycosylation. *Proc Natl Acad Sci U S A* 2000;97:13114–9.
- [58] Tan HL, Bezzina CR, Smits JP, Verkerk AO, Wilde AA. Genetic control of sodium channel function. *Cardiovasc Res* 2003;57:961–73.
- [59] Lu T, Lee HC, Kabat JA, Shibata EF. Modulation of rat cardiac sodium channel by the stimulatory G protein alpha subunit. *J Physiol* 1999;518(Pt 2):371–84.
- [60] Ono K, Fozzard HA, Hanck DA. Mechanism of cAMP-dependent modulation of cardiac sodium channel current kinetics. *Circ Res* 1993;72:807–15.
- [61] Zhou J, Yi J, Hu N, George Jr AL, Murray KT. Activation of protein kinase A modulates trafficking of the human cardiac sodium channel in *Xenopus* oocytes. *Circ Res* 2000;87:33–8.
- [62] Matsuda JJ, Lee H, Shibata EF. Enhancement of rabbit cardiac sodium channels by beta-adrenergic stimulation. *Circ Res* 1992;70:199–207.
- [63] Rybin VO, Xu X, Lisanti MP, Steinberg SF. Differential targeting of beta-adrenergic receptor subtypes and adenylyl cyclase to cardiomyocyte caveolae. A mechanism to functionally regulate the cAMP signaling pathway. *J Biol Chem* 2000;275:41447–57.
- [64] Bers DM. Macromolecular complexes regulating cardiac ryanodine receptor function. *J Mol Cell Cardiol* 2004;37:417–29.
- [65] Galbiati F, Engelman JA, Volonte D, Zhang XL, Minetti C, Li M, et al. Caveolin-3 null mice show a loss of caveolae, changes in the microdomain distribution of the dystroglycoprotein complex, and t-tubule abnormalities. *J Biol Chem* 2001;276:21425–33.
- [66] Lopez-Lopez JR, Shacklock PS, Balke CW, Wier WG. Local calcium transients triggered by single L-type calcium channel currents in cardiac cells. *Science* 1995;268:1042–5.
- [67] Drab M, Verkade P, Elger M, Kasper M, Lohn M, Lauterbach B, et al. Loss of caveolae, vascular dysfunction, and pulmonary defects in caveolin-1 gene-disrupted mice. *Science* 2001;293:2449–52.
- [68] Lohn M, Furstenau M, Sagach V, Elger M, Schulze W, Luft FC, et al. Ignition of calcium sparks in arterial and cardiac muscle through caveolae. *Circ Res* 2001;87:1034–9.
- [69] Darby PJ, Kwan CY, Daniel EE. Caveolae from canine airway smooth muscle contain the necessary components for a role in Ca<sup>2+</sup> handling. *Am J Physiol Lung Cell Mol Physiol* 2000;279:L1226–35.
- [70] Lipp P, Laine M, Tovey SC, Burrell KM, Berridge MJ, Li W, et al. Functional InsP<sub>3</sub> receptors that may modulate excitation–contraction coupling in the heart. *Curr Biol* 2000;10:939–42.
- [71] Blatter LA, Kocksammer J, Sheehan KA, Zima AV, Huser J, Lipsius SL. Local calcium gradients during excitation–contraction coupling and alternans in atrial myocytes. *J Physiol* 2003;546:19–31.
- [72] Yamada J, Ohkusa T, Nao T, Ueyama T, Yano M, Kobayashi S, et al. Up-regulation of inositol 1, 4, 5-trisphosphate receptor expression in atrial tissue in patients with chronic atrial fibrillation. *J Cardiol* 2002;39:57–8 [CVR-2005-1012R1 22].
- [73] Mohler PJ, Davis JQ, Davis LH, Hoffman JA, Michaely P, Bennett V. Inositol 1,4,5- trisphosphate receptor localization and stability in neonatal cardiomyocytes requires interaction with ankyrin-B. *J Biol Chem* 2004;279:12980–7.
- [74] Bennett V, Chen L. Ankyrins and cellular targeting of diverse membrane proteins to physiological sites. *Curr Opin Cell Biol* 2001;13:61–7.
- [75] Tuvia S, Buhusi M, Davis L, Reedy M, Bennett V. Ankyrin-B is required for intracellular sorting of structurally diverse Ca<sup>2+</sup> homeostasis proteins. *J Cell Biol* 1999;147:995–1008.
- [76] Mohler PJ, Schott JJ, Gramolini AO, Dilly KW, Guatimosim S, duBell WH, et al. Ankyrin-B mutation causes type 4 long-QT cardiac arrhythmia and sudden cardiac death. *Nature* 2003;421:634–9.
- [77] Fujimoto T, Miyawaki A, Mikoshiba K. Inositol 1,4,5-trisphosphate receptor-like protein in plasmalemmal caveolae is linked to actin filaments. *J Cell Sci* 1995;108(Pt 1):7–15.
- [78] Singleton PA, Bourguignon LY. CD44 interaction with ankyrin and IP<sub>3</sub> receptor in lipid rafts promotes hyaluronan-mediated Ca<sup>2+</sup> signaling leading to nitric oxide production and endothelial cell adhesion and proliferation. *Exp Cell Res* 2004;295:102–18.
- [79] Masson-Pevet M, Gros D. Pinocytotic function of the membrane vesicles, or caveolae, in heart muscle cells. *Adv Myocardiol* 1980;1:23–31.
- [80] Barbuti A, Gravante B, Riolfo M, Milanese R, Terragni B, DiFrancesco D. Localization of pacemaker channels in lipid rafts regulates channel kinetics. *Circ Res* 2004;94:1325–31.
- [81] Schubert AL, Schubert W, Spray DC, Lisanti MP. Connexin family members target to lipid raft domains and interact with caveolin-1. *Biochemistry* 2002;41:5754–64.
- [82] Barth K, Gentsch M, Blasche R, Pfuller A, Parshyna I, Koslowski R, et al. Distribution of caveolin-1 and connexin43 in normal and injured alveolar epithelial R3/1 cells. *Histochem Cell Biol* 2005;123:239–47.
- [83] Colaco CA, Evans WH. A biochemical dissection of the cardiac intercalated disk: isolation of subcellular fractions containing fascia adherentes and gap junctions. *J Cell Sci* 1981;52:313–25.
- [84] Severs NJ. Plasma membrane cholesterol in myocardial muscle and capillary endothelial cells. Distribution of filipin-induced deformations in freeze-fracture. *Eur J Cell Biol* 1981;25:289–99.
- [85] Laing JG, Chou BC, Steinberg TH. ZO-1 alters the plasma membrane localization and function of Cx43 in osteoblastic cells. *J Cell Sci* 2005;118:2167–76.
- [86] Barker RJ, Price RL, Gourdie RG. Increased co-localization of connexin43 and ZO-1 in dissociated adult myocytes. *Cell Commun Adhes* 2001;8:205–8.
- [87] Leonoudakis D, Conti LR, Anderson S, Radeke CM, McGuire LM, Adams ME, et al. Protein trafficking and anchoring complexes revealed by proteomic analysis of inward rectifier potassium channel (Kir2.x)-associated proteins. *J Biol Chem* 2004;279:22331–46.
- [88] Lee S, Fan S, Makarova O, Straight S, Margolis B. A novel and conserved protein-protein interaction domain of mammalian Lin-2/CASK binds and recruits SAP97 to the lateral surface of epithelia. *Mol Cell Biol* 2002;22:1778–91.
- [89] Bachmann A, Timmer M, Sierralta J, Pietrini G, Gundelfinger ED, Knust E, et al. Cell type-specific recruitment of *Drosophila* Lin-7 to distinct MAGUK-based protein complexes defines novel roles for Sdt and Dlg-S97. *J Cell Sci* 2004;117:1899–909.
- [90] Sanford JL, Mays TA, Rafael-Fortney JA. CASK and Dlg form a PDZ protein complex at the mammalian neuromuscular junction. *Muscle Nerve* 2004;30:164–71 [CVR-2005-1012R1 23].
- [91] Leonoudakis D, Conti LR, Radeke CM, McGuire LM, Vandenberg CA. A multiprotein trafficking complex composed of SAP97, CASK, Veli, and Mint1 is associated with inward rectifier Kir2 potassium channels. *J Biol Chem* 2004;279:19051–63.
- [92] Maximov A, Sudhof TC, Bezprozvanny I. Association of neuronal calcium channels with modular adaptor proteins. *J Biol Chem* 1999;274:24453–6.
- [93] Sierralta J, Mendoza C. PDZ-containing proteins: alternative splicing as a source of functional diversity. *Brain Res Brain Res Rev* 2004;47:105–15.
- [94] Croci C, Brandstatter JH, Enz R. ZIP3, a new splice variant of the PKC-zeta-interacting protein family, binds to GABAC receptors, PKC-zeta, and Kv beta 2. *J Biol Chem* 2003;278:6128–35.

- [95] Yoshimura Y, Shinkawa T, Taoka M, Kobayashi K, Isobe T, Yamauchi T. Identification of protein substrates of Ca<sup>2+</sup>/calmodulin-dependent protein kinase II in the postsynaptic density by protein sequencing and mass spectrometry. *Biochem Biophys Res Commun* 2002;290:948–54.
- [96] Mauceri D, Cattabeni F, Di Luca M, Gardoni F. Calcium/calmodulin-dependent protein kinase II phosphorylation drives synapse-associated protein 97 into spines. *J Biol Chem* 2004;279:23813–21.
- [97] Tessier S, Karczewski P, Krause EG, Pansard Y, Acar C, Lang-Lazdunski M, et al. Regulation of the transient outward K<sup>+</sup> current by Ca<sup>2+</sup>/calmodulin-dependent protein kinases II in human atrial myocytes. *Circ Res* 1999;85:810–9.
- [98] Carlier E, Dargent B, De Waard M, Couraud F. Na<sup>+</sup> channel regulation by calmodulin kinase II in rat cerebellar granule cells. *Biochem Biophys Res Commun* 2000;274:394–9.
- [99] Wehrens XH, Lehnart SE, Reiken SR, Marks AR. Ca<sup>2+</sup>/calmodulin-dependent protein kinase II phosphorylation regulates the cardiac ryanodine receptor. *Circ Res* 2004;94:e61–70.
- [100] Bare DJ, Kettlun CS, Liang M, Bers DM, Mignery GA. Cardiac type 2 inositol 1,4,5- trisphosphate receptor: interaction and modulation by calcium/calmodulin-dependent protein kinase II. *J Biol Chem* 2005;280:15912–20.
- [101] Sergeant GP, Ohya S, Reihill JA, Perrino BA, Amberg GC, Imaizumi Y, et al. Regulation of Kv4.3 currents by Ca<sup>2+</sup>/calmodulin-dependent protein kinase II. *Am J Physiol Cell Physiol* 2005;288:C304–13.
- [102] O-Uchi J, Komukai K, Kusakari Y, Obata T, Hongo K, Sasaki H, et al. Alpha1-adrenoceptor stimulation potentiates L-type Ca<sup>2+</sup> current through Ca<sup>2+</sup>/calmodulin-dependent PK II (CaMKII) activation in rat ventricular myocytes. *Proc Natl Acad Sci U S A* 2005;102:9400–5.
- [103] Tsui J, Inagaki M, Schulman H. Calcium/calmodulin-dependent protein kinase II (CaMKII) localization acts in concert with substrate targeting to create spatial restriction for phosphorylation. *J Biol Chem* 2005;280:9210–6.
- [104] Wang X, Tian QB, Okano A, Sakagami H, Moon IS, Kondo H, et al. BAALC 1-6-8 protein is targeted to postsynaptic lipid rafts by its N-terminal myristoylation and palmitoylation, and interacts with alpha, but not beta, subunit of Ca/calmodulin-dependent protein kinase II. *J Neurochem* 2005;92:647–59.
- [105] Colledge M, Dean RA, Scott GK, Langeberg LK, Hagan RL, Scott JD. Targeting of PKA to glutamate receptors through a MAGUK-AKAP complex. *Neuron* 2000;27:107–19.
- [106] Tasken K, Aandahl EM. Localized effects of cAMP mediated by distinct routes of protein kinase A. *Physiol Rev* 2004;84:137–67.
- [107] Chen L, Kurokawa J, Kass RS. Phosphorylation of the AKAP Yotiao contributes to PKA regulation of a heart potassium channel. *J Biol Chem* 2005 [CVR-2005-1012R1 24].
- [108] Gao T, Yatani A, Dell'Acqua ML, Sako H, Green SA, Dascal N, et al. cAMP-dependent regulation of cardiac L-type Ca<sup>2+</sup> channels requires membrane targeting of PKA and phosphorylation of channel subunits. *Neuron* 1997;19:185–96.
- [109] Fraser ID, Tavalin SJ, Lester LB, Langeberg LK, Westphal AM, Dean RA, et al. A novel lipid-anchored A-kinase anchoring protein facilitates cAMP-responsive membrane events. *EMBO J* 1998;17:2261–72.
- [110] Bers DM. Cardiac excitation–contraction coupling. *Nature* 2002;415:198–205.
- [111] Davare MA, Horne MC, Hell JW. Protein phosphatase 2A is associated with class C L-type calcium channels (Cav1.2) and antagonizes channel phosphorylation by cAMP-dependent protein kinase. *J Biol Chem* 2000;275:39710–7.
- [112] Head BP, Patel HH, Roth DM, Lai NC, Niesman IR, Farquhar MG, et al. G-protein coupled receptor signaling components localize in both sarcolemmal and intracellular Caveolin-3-associated microdomains in adult cardiac myocytes. *J Biol Chem* 2005;280:31036–44.
- [113] Crawford GE, Faulkner JA, Crosbie RH, Campbell KP, Froehner SC, Chamberlain JS. Assembly of the dystrophin-associated protein complex does not require the dystrophin COOH terminal domain. *J Cell Biol* 2000;150:1399–410.
- [114] Sotgia F, Lee JK, Das K, Bedford M, Petrucci TC, Macioce P, et al. Caveolin-3 directly interacts with the C-terminal tail of beta-dystroglycan. Identification of a central WW-like domain within caveolin family members. *J Biol Chem* 2000;275:38048–58.
- [115] Cote PD, Moukhles H, Carbonetto S. Dystroglycan is not required for localization of dystrophin, syntrophin, and neuronal nitric-oxide synthase at the sarcolemma but regulates integrin alpha 7B expression and caveolin-3 distribution. *J Biol Chem* 2002;277:4672–9.
- [116] Stedman HH, Sweeney HL, Shrager JB, Maguire HC, Panettieri RA, Petrof B, et al. The mdx mouse diaphragm reproduces the degenerative changes of Duchenne muscular dystrophy. *Nature* 1991;352:536–9.
- [117] Friedrich O, Both M, Gillis JM, Chamberlain JS, Fink RH. Mini-dystrophin restores L-type calcium currents in skeletal muscle of transgenic mdx mice. *J Physiol* 2004;555:251–65.
- [118] Schultz J, Hoffmuller U, Krause G, Ashurst J, Macias MJ, Schmieder P, et al. Specific interactions between the syntrophin PDZ domain and voltage-gated sodium channels. *Nat Struct Biol* 1998;5:19–24.
- [119] Causeret M, Taulet N, Comunale F, Favard C, Gauthier-Rouviere C. N-cadherin association with lipid rafts regulates its dynamic assembly at cell–cell junctions in C2C12 myoblasts. *Mol Biol Cell* 2005;16:2168–80.
- [120] Wei CJ, Francis R, Xu X, Lo CW. Connexin43 associated with an N-cadherin-containing multiprotein complex is required for gap junction formation in NIH3T3 cells. *J Biol Chem* 2005;280:19925–36.
- [121] Ratajczak P, Damy T, Heymes C, Oliviero P, Marotte F, Robidel E, et al. Caveolin-1 and -3 dissociations from caveolae to cytosol in the heart during aging and after myocardial infarction in rat. *Cardiovasc Res* 2003;57:358–69.
- [122] Woodman SE, Park DS, Cohen AW, Cheung MW, Chandra M, Shirani J, et al. Caveolin-3 knock-out mice develop a progressive cardiomyopathy and show hyperactivation of the p42/44 MAPK cascade. *J Biol Chem* 2002;277:38988–97.
- [123] Aravamudan B, Volonte D, Ramani R, Gursoy E, Lisanti MP, London B, et al. Transgenic overexpression of caveolin-3 in the heart induces a cardiomyopathic phenotype. *Hum Mol Genet* 2003;12:2777–88 [CVR-2005-1012R1 25].
- [124] Doyle DD, Ambler SK, Upshaw-Earley J, Bastawrous A, Goings E, Page E. Type B atrial natriuretic peptide receptor in cardiac myocyte caveolae. *Circ Res* 1997;81:86–91.
- [125] Franco V, Chen YF, Oparil S, Feng JA, Wang D, Hage F, et al. Atrial natriuretic peptide dose-dependently inhibits pressure overload-induced cardiac remodeling. *Hypertension* 2004;44:746–50.
- [126] Lonardo G, Cerbai E, Casini S, Giunti G, Bonacchi M, Battaglia F, et al. Atrial natriuretic peptide modulates the hyperpolarization-activated current (I<sub>f</sub>) in human atrial myocytes. *Cardiovasc Res* 2004;63:528–36.
- [127] Kohl P, Cooper PJ, Holloway H. Effects of acute ventricular volume manipulation on in situ cardiomyocyte cell membrane configuration. *Prog Biophys Mol Biol* 2003;82:221–7.
- [128] Peivandi AA, Huhn A, Lehr HA, Jin S, Troost J, Salha S, et al. Upregulation of phospholipase d expression and activation in ventricular pressure-overload hypertrophy. *J Pharmacol Sci* 2005;98:244–54.
- [129] Goebel J, Logan B, Forrest K, Mieczkowski A, Roszman TL, Wills-Karp M. Atorvastatin affects interleukin-2 signaling by altering the lipid raft enrichment of the interleukin-2 receptor Beta chain. *J Investig Med* 2005;53:322–8.
